# Supplementary material
Source: MDPI journal article supplement (https://www.mdpi.com/2073-4352/12/4/533)
Supplement: s1 [file s1]

## Zeolitic Imidazolate Framework 67-derived Ce-doped CoP@N-doped Carbon Hollow Polyhedron as High-Performance Anodes for Lithium-Ion Batteries

YanJun Zhai<sup>1,\*</sup>, Shuli Zhou<sup>1</sup>, Linlin Guo<sup>1</sup>, Xiaole Xin<sup>1</sup>, Suyuan Zeng<sup>1</sup>, Konggang Qu<sup>1</sup>, Nana Wang<sup>2</sup>, Xianxi Zhang<sup>1,\*</sup>

<sup>1</sup> Department of Chemistry and Chemical Engineering, Shandong Key Laboratory of Chemical Energy Storage and Novel Cell Technology, Liaocheng University, Liaocheng, 252059, China;

zhouli1996@126.com (S.Z.); [15506436037@163.com](mailto:15506436037@163.com) (L.G.); xx115865517198@163.com (X.X.); [drzengsy@163.com](mailto:drzengsy@163.com) (S.Z.); [qukonggang@lcu.edu.cn](mailto:qukonggang@lcu.edu.cn) (K.Q.)

<sup>2</sup> Institute for Superconducting and Electronic Materials, University of Wollongong Innovation Campus, Wollongong New South Wales, 2500, Australia; nanaw@uow.edu.au

\* Correspondence: [zhaiyanjun@lcu.edu.cn](mailto:zhaiyanjun@lcu.edu.cn) (Y.Z.); [xxzhang3@126.com](mailto:xxzhang3@126.com) (X.Z.)

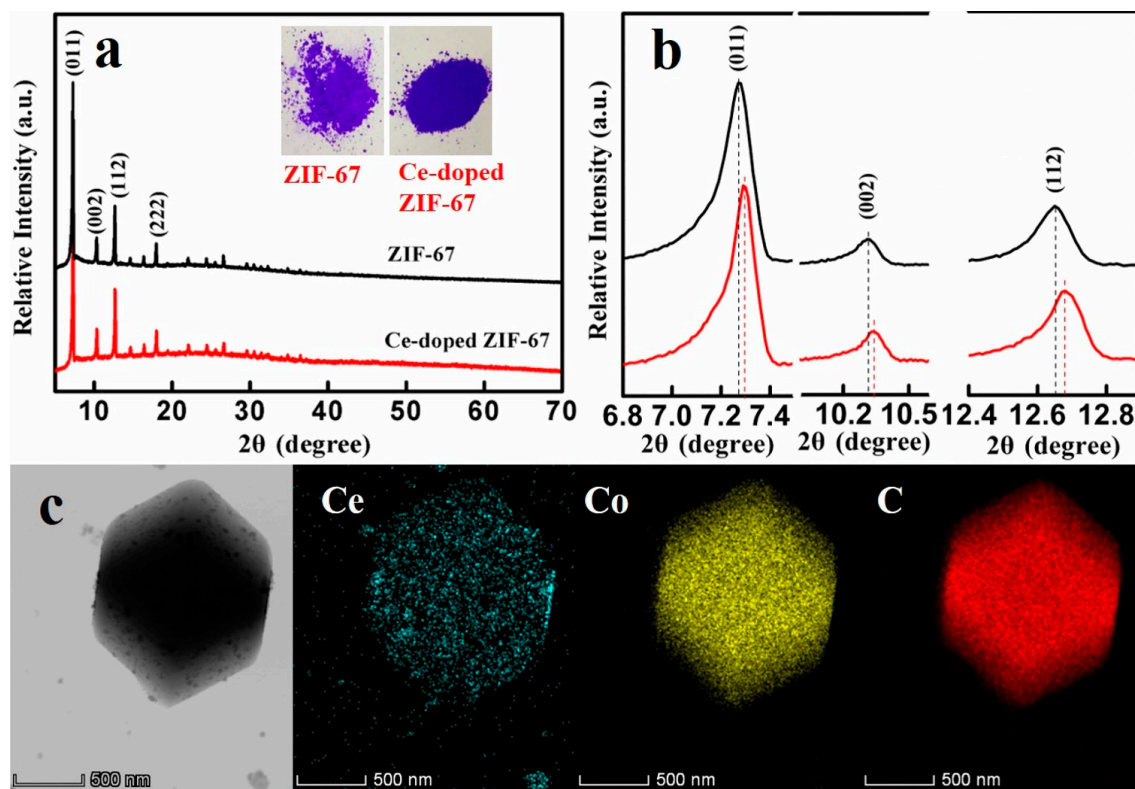

**Figure S1.** (a) XRD patterns of ZIF-67 and Ce-doped ZIF-67. (b) the magnified region of  $2\theta = 16.7\text{--}18.0^\circ$  showing a peak shift. (c) EDX elemental mapping images of Ce, Co and C for Ce-doped ZIF-67.

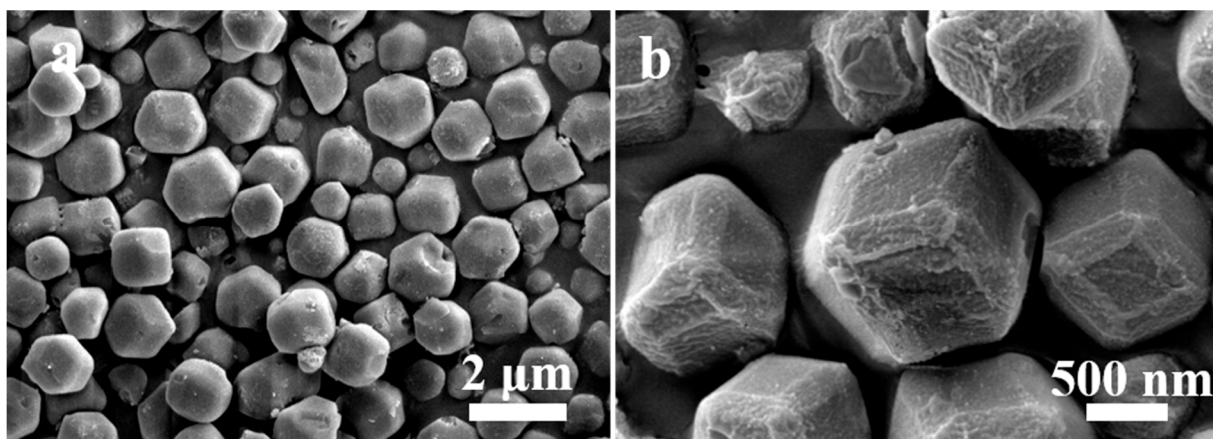

**Figure S2.** SEM images of Ce-doped ZIF-67.

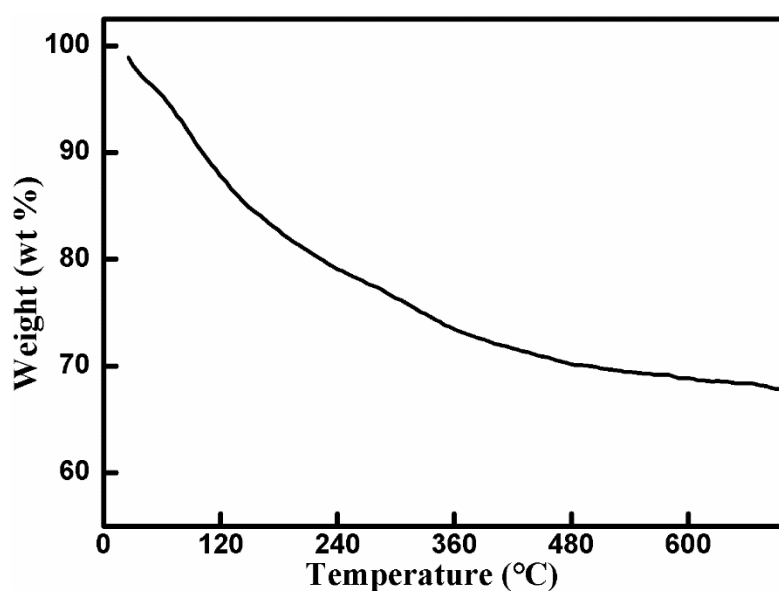

**Figure S3.** The TGA curves of Ce-doped ZIF-67.

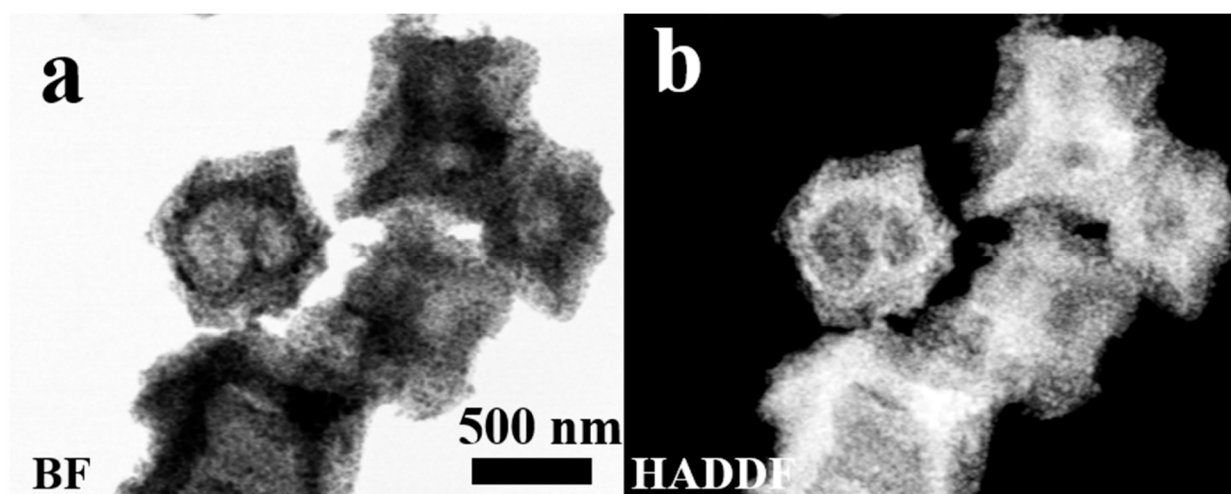

**Figure S4.** (a) TEM bright field (BF) image, (b) HAADF-STEM image of Ce-doped Co/CN.

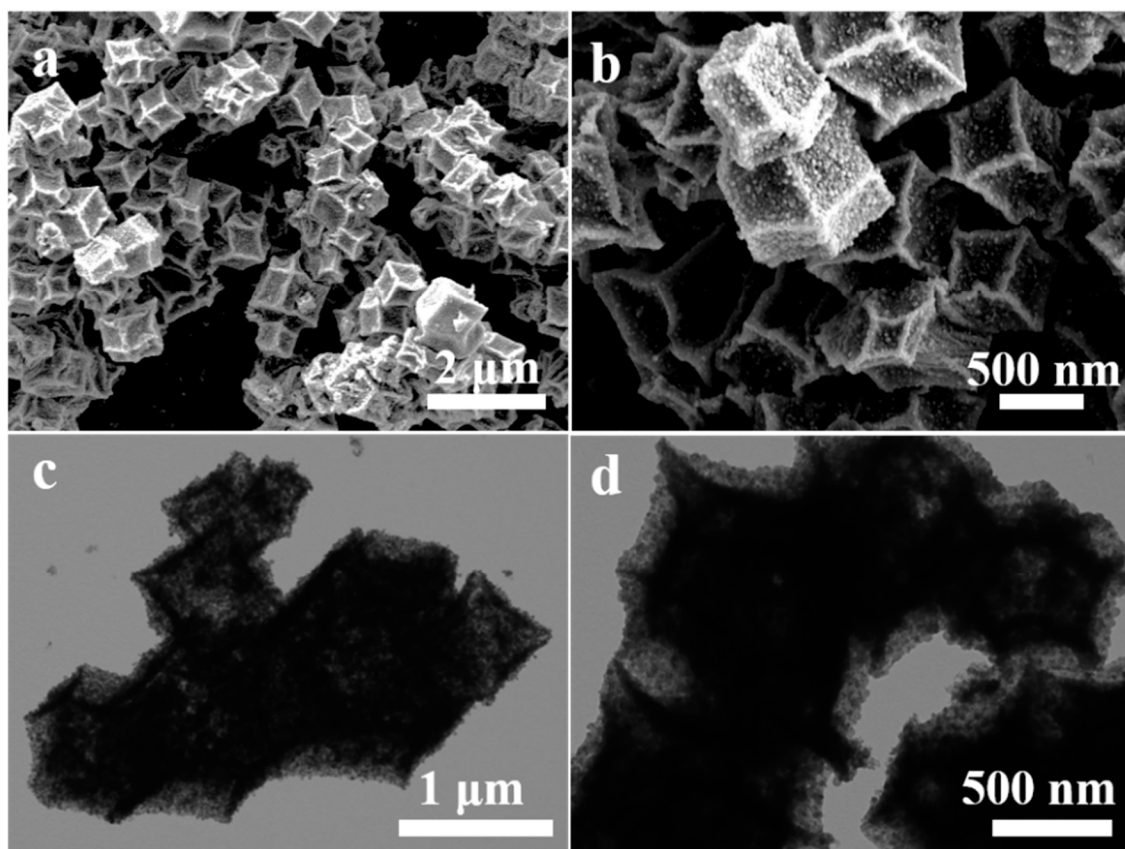

**Figure S5.** (a, b) SEM images and (c, d) TEM images of CoP.

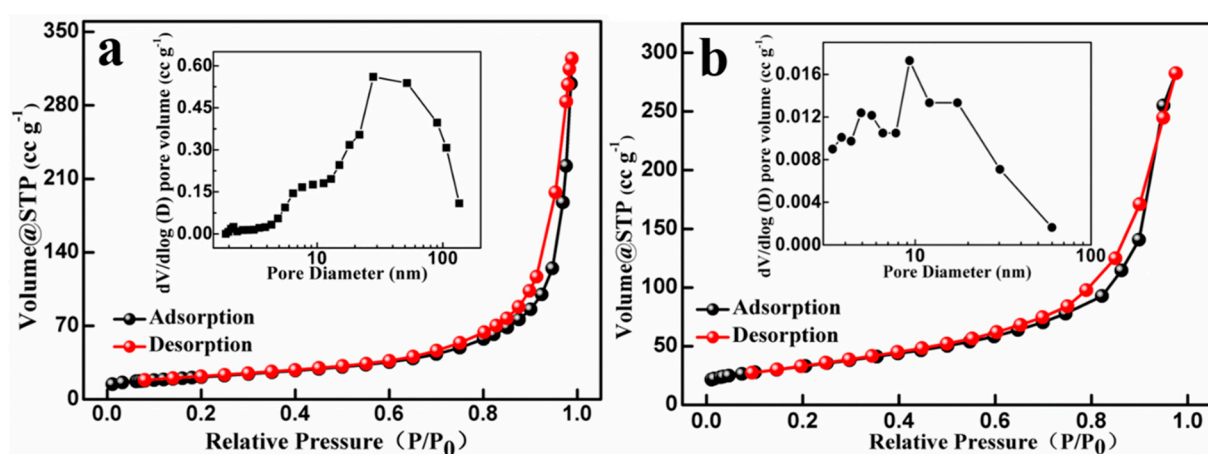

**Figure S6.** N<sub>2</sub> adsorption/desorption isotherm and the corresponding pore size distributions (inset) of (a) CoP/NC and (b) Ce-doped CoP/NC.

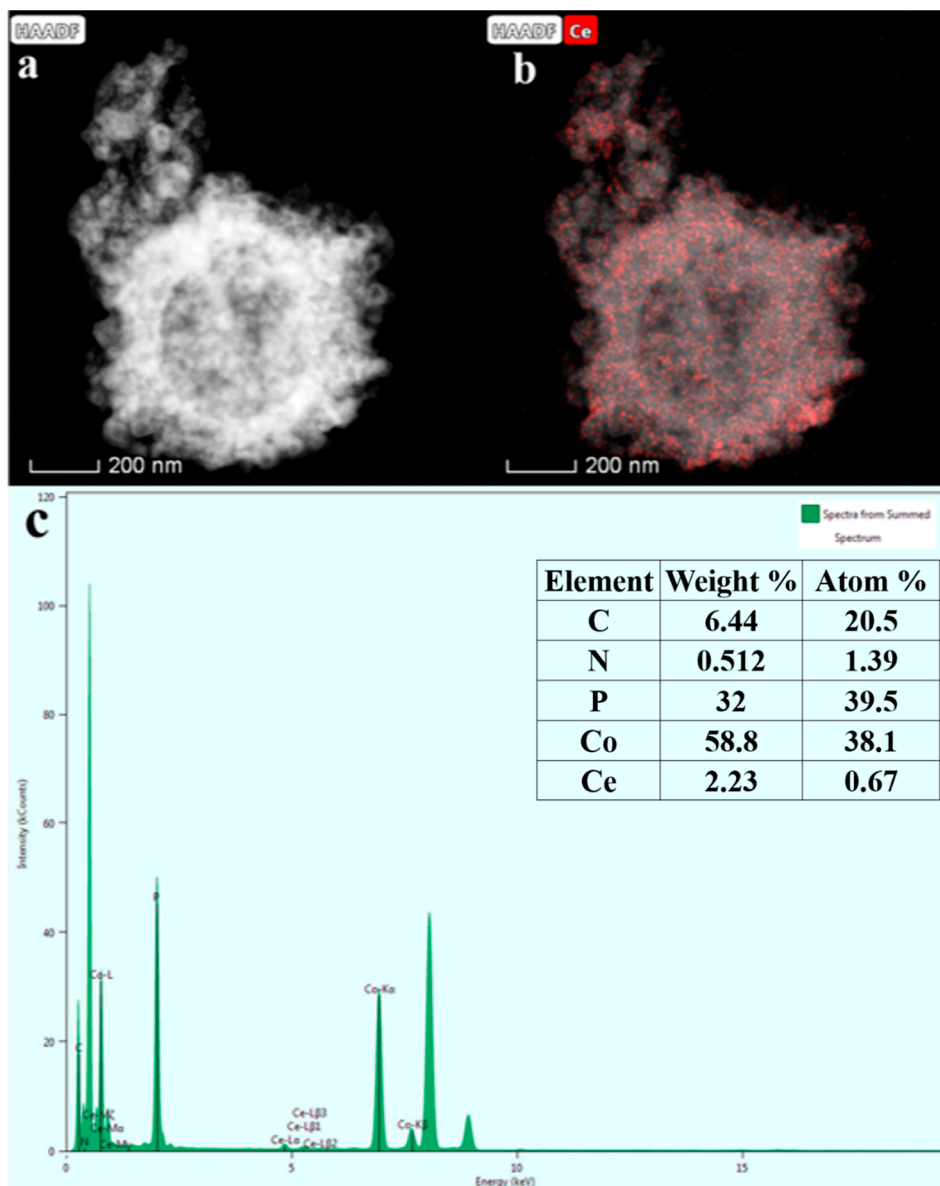

**Figure S7.** (a, b) HAADF-STEM images and (b) EDX of Ce-doped CoP/NC.

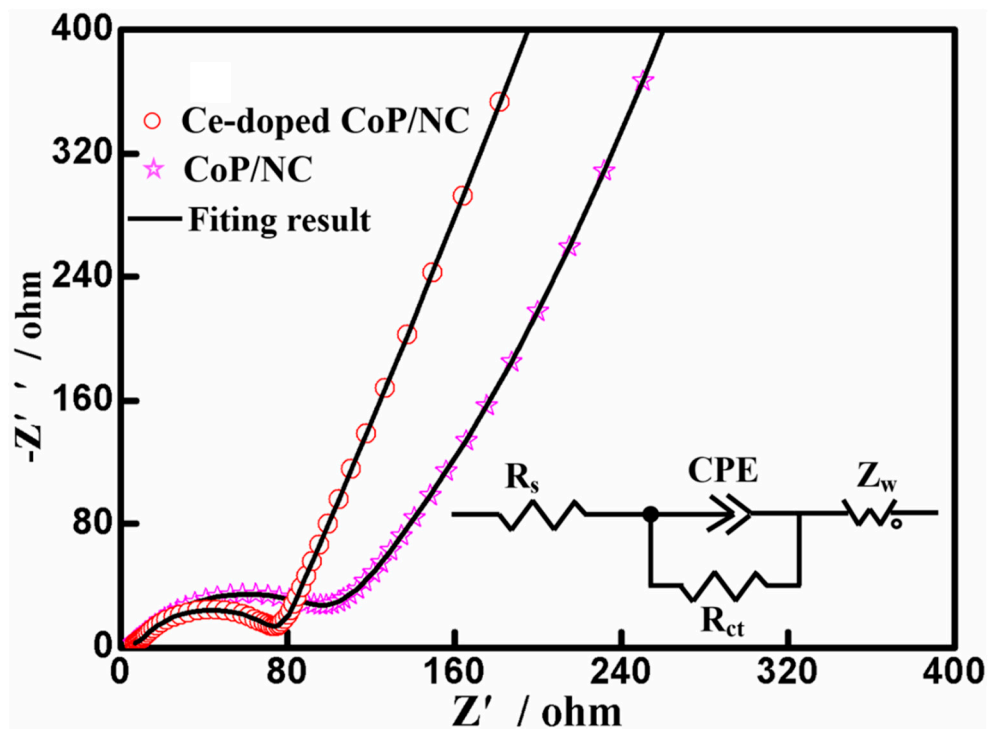

**Figure S8.** Nyquist plot and equivalent circuit model of Ce-doped CoP@NC and pure CoP@NC electrodes.
